# Supplementary material
Source: Springer Nature journal article supplement (https://www.springermedizin.de/resource/supplementary/12906_2006_104_MOESM7_ESM.pdf/9524028)

Day 3

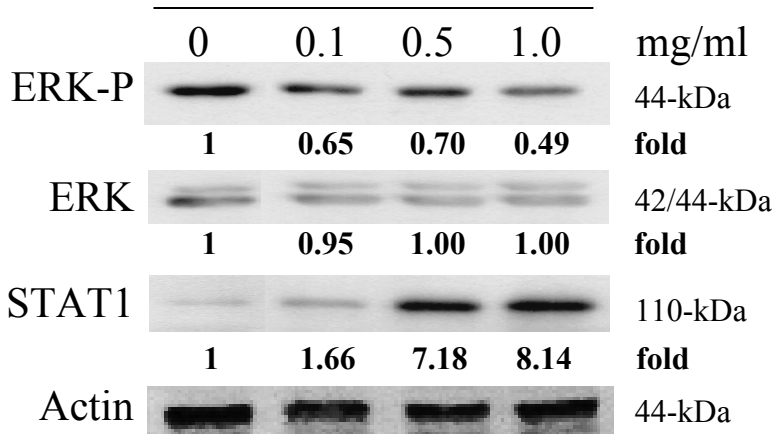

Supplement: MOESM7 [file 9524028]
